# Supplementary material for: Metabolic Responses to Butyrate Supplementation in LF- and HF-Fed Mice Are Cohort-Dependent and Associated with Changes in Composition and Function of the Gut Microbiota
Source: PubMed Central journal article supplement (PMC7696936; doi:10.3390/nu12113524), 2020-11-16
Supplement: nutrients-12-03524-s001.pdf [file nutrients-12-03524-s001.pdf]

Supplemental Figure 1

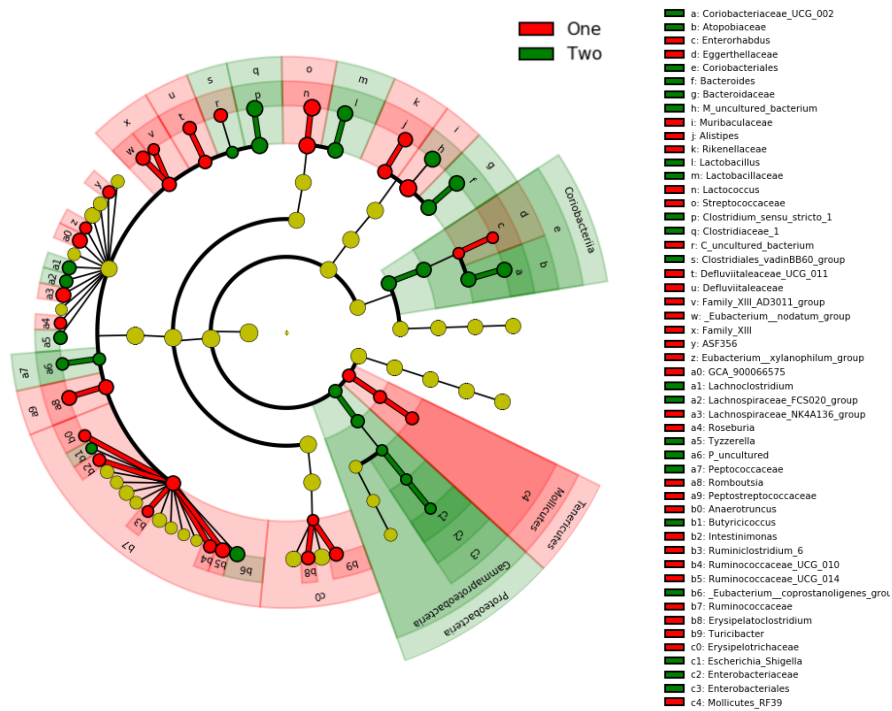

Supplemental Figure 1: Cladogram generated from LEfSe analysis showing the most differentially abundant taxa enriched in microbiota; red indicating cohort 1 and green cohort 2.

Supplemental Table 1: Beta diversity Metrics: ANOSIM pairwise comparisons by diet, treatment, and cohort.

| <b>Variable</b> | <b>Group 1</b> | <b>Group 2</b> | <b>Unweighted UF</b> | <b>Weighted UF</b> | <b>Bray-Curtis</b> | <b>Jaccard</b> |
|-----------------|----------------|----------------|----------------------|--------------------|--------------------|----------------|
| Diet            | LF             | HF             | 0.035                | 0.003              | 0.001              | 0.015          |
| Tx              | CON            | MB             | 0.626                | 0.044              | 0.078              | 0.322          |
| Cohort          | C1             | C2             | 0.001                | 0.002              | 0.001              | 0.001          |

Supplemental Table 2: Differentially abundant fecal microbiota genera between cohorts. Magnitude and directionality demonstrated by effect parameter (positive effect- increased in cohort 2; negative effect- decreased in cohort 2.) A cutoff of Benjamini-Hochberg adjusted  $p < 0.05$  for Welch's t or Wilcoxon rank sum tests were used to identify differentially regulated genera. (n=23-24/cohort)

| Taxa                                                                                      | effect | Welch.BH | Wilcox.BH |
|-------------------------------------------------------------------------------------------|--------|----------|-----------|
| Bacteroidetes;Bacteroidia;Bacteroidales;Bacteroidaceae;Bacteroides                        | 4.300  | 0.0000   | 0.0000    |
| Firmicutes;Clostridia;Clostridiales;Ruminococcaceae;[Eubacterium] coprostanoligenes group | 4.150  | 0.0000   | 0.0000    |
| Actinobacteria;Coriobacteriia;Coriobacteriales;Atopobiaceae;Coriobacteriaceae UCG-002     | 3.799  | 0.0000   | 0.0000    |
| Firmicutes;Clostridia;Clostridiales;Ruminococcaceae;Ruminococcaceae UCG-010               | -3.042 | 0.0000   | 0.0000    |
| Bacteroidetes;Bacteroidia;Bacteroidales;Rikenellaceae;Alistipes                           | -2.880 | 0.0000   | 0.0000    |
| Firmicutes;Clostridia;Clostridiales;Lachnospiraceae;Roseburia                             | -1.954 | 0.0000   | 0.0000    |
| Firmicutes;Clostridia;Clostridiales;Lachnospiraceae;GCA-900066575                         | -1.945 | 0.0000   | 0.0000    |
| Bacteroidetes;Bacteroidia;Bacteroidales;Muribaculaceae;uncultured bacterium               | 1.892  | 0.0000   | 0.0000    |
| Firmicutes;Clostridia;Clostridiales;Lachnospiraceae;Lachnospiraceae FCS020 group          | 1.716  | 0.0000   | 0.0000    |
| Firmicutes;Clostridia;Clostridiales;Deffluviitaleaceae;Deffluviitaleaceae UCG-011         | -1.384 | 0.0000   | 0.0000    |
| Actinobacteria;Coriobacteriia;Coriobacteriales;Eggerthellaceae;Enterorhabdus              | -1.206 | 0.0001   | 0.0000    |
| Firmicutes;Clostridia;Clostridiales;Lachnospiraceae;ASF356                                | -1.142 | 0.0002   | 0.0000    |
| Firmicutes;Clostridia;Clostridiales;Clostridiales vadinBB60 group;uncultured bacterium    | -1.088 | 0.0001   | 0.0000    |
| Firmicutes;Clostridia;Clostridiales;Family XIII;[Eubacterium] nodatum group               | -1.041 | 0.0003   | 0.0000    |
| Firmicutes;Clostridia;Clostridiales;Peptococcaceae;uncultured                             | 0.974  | 0.0151   | 0.0000    |
| Firmicutes;Clostridia;Clostridiales;Ruminococcaceae;Intestinimonas                        | -0.926 | 0.0022   | 0.0002    |
| Bacteroidetes;Bacteroidia;Bacteroidales;Muribaculaceae;__                                 | -0.855 | 0.0002   | 0.0003    |
| Firmicutes;Bacilli;Lactobacillales;Lactobacillaceae;Lactobacillus                         | 0.774  | 0.0010   | 0.0016    |
| Firmicutes;Clostridia;Clostridiales;Lachnospiraceae;Lachnospiraceae Lachnospiraceae       | 0.694  | 0.0042   | 0.0058    |
| Firmicutes;Clostridia;Clostridiales;Ruminococcaceae;Ruminococcaceae UCG-014               | -0.694 | 0.0030   | 0.0007    |
| Firmicutes;Clostridia;Clostridiales;Lachnospiraceae;[Eubacterium] xylanophilum group      | -0.687 | 0.0203   | 0.0154    |
| Firmicutes;Erysipelotrichia;Erysipelotrichales;Erysipelotrichaceae;Erysipelatoclostridium | -0.668 | 0.0083   | 0.0045    |
| Firmicutes;Clostridia;Clostridiales;Ruminococcaceae;Butyrivibrio                          | 0.664  | 0.0177   | 0.0091    |
| Firmicutes;Clostridia;Clostridiales;Family XIII;Family XIII AD3011 group                  | -0.602 | 0.0395   | 0.0308    |
| Firmicutes;Clostridia;Clostridiales;Ruminococcaceae;Ruminococcaceae Ruminococcaceae       | 0.591  | 0.0083   | 0.0137    |
| Firmicutes;Erysipelotrichia;Erysipelotrichales;Erysipelotrichaceae;Turicibacter           | -0.585 | 0.0368   | 0.0608    |
| Firmicutes;Clostridia;Clostridiales;Clostridiales vadinBB60 group;__                      | 0.581  | 0.0235   | 0.0173    |
| Tenericutes;Mollicutes;Mollicutes RF39;__;__                                              | -0.571 | 0.0069   | 0.0016    |
| Proteobacteria;Gammaproteobacteria;Betaproteobacteriales;Burkholderiaceae;Parasutterella  | 0.555  | 0.0067   | 0.0570    |
| Firmicutes;Clostridia;Clostridiales;Clostridiaceae 1;Clostridium sensu stricto 1          | 0.521  | 0.0033   | 0.0064    |
| Firmicutes;Clostridia;Clostridiales;Peptostreptococcaceae;Romoutsia                       | -0.505 | 0.0081   | 0.0043    |

Supplemental Table 3: Effect of diet, treatment, and cohort on levels of bacterial metabolites in feces. Data expressed as nmol/g, mean  $\pm$  SEM n=6 for each group.

| Variable    | Cohort1            |                     |                    |                     | Cohort2             |                      |                     |                    | 3 way ANOVA P values |         |           |               |                    |                  |                           |
|-------------|--------------------|---------------------|--------------------|---------------------|---------------------|----------------------|---------------------|--------------------|----------------------|---------|-----------|---------------|--------------------|------------------|---------------------------|
|             | LF_CON             | LF_MB               | HF_CON             | HF_MB               | LF_CON              | LF_MB                | HF_CON              | HF_MB              | Cohort               | Diet    | Treatment | Cohort x Diet | Cohort x Treatment | Diet x Treatment | Cohort x Diet x Treatment |
| Acetic      | 858.04 $\pm$ 44.39 | 949.62 $\pm$ 148.98 | 813.02 $\pm$ 43.02 | 922.15 $\pm$ 170.15 | 1267.48 $\pm$ 292.7 | 1047.23 $\pm$ 227.37 | 949.52 $\pm$ 110.13 | 761.72 $\pm$ 83.52 | 0.307                | 0.155   | 0.659     | 0.262         | 0.200              | 0.915            | 0.975                     |
| Butyric     | 16.87 $\pm$ 7.54   | 19.47 $\pm$ 8.66    | 47.62 $\pm$ 10.13  | 88.23 $\pm$ 31.44   | 9.06 $\pm$ 4.02     | 22.08 $\pm$ 8.54     | 27.08 $\pm$ 9.48    | 112.63 $\pm$ 34.89 | 0.980                | 0.000   | 0.012     | 0.866         | 0.306              | 0.045            | 0.522                     |
| Isobutyric  | 32.1 $\pm$ 4.11    | 23.98 $\pm$ 3.07    | 37.68 $\pm$ 1.88   | 44.43 $\pm$ 9.56    | 17.57 $\pm$ 2.37    | 15.9 $\pm$ 1.88      | 30.43 $\pm$ 7.77    | 21.37 $\pm$ 5.12   | 0.001                | 0.006   | 0.435     | 0.618         | 0.545              | 0.629            | 0.154                     |
| Formic      | 486.1 $\pm$ 86.71  | 487.7 $\pm$ 60.56   | 415.88 $\pm$ 58.88 | 584.38 $\pm$ 94.98  | 647.88 $\pm$ 140.92 | 596.35 $\pm$ 98.52   | 485.12 $\pm$ 101.82 | 360.43 $\pm$ 27.81 | 0.661                | 0.163   | 0.982     | 0.113         | 0.194              | 0.722            | 0.365                     |
| Hexanoic    | 3.33 $\pm$ 0.46    | 3.18 $\pm$ 0.17     | 3.44 $\pm$ 0.23    | 2.4 $\pm$ 0.16      | 3.28 $\pm$ 0.16     | 3.07 $\pm$ 0.18      | 3.57 $\pm$ 0.62     | 2.97 $\pm$ 0.28    | 0.575                | 0.599   | 0.038     | 0.362         | 0.691              | 0.180            | 0.590                     |
| Propionic   | 102.13 $\pm$ 18.13 | 79.35 $\pm$ 17.62   | 81.86 $\pm$ 20.55  | 143.98 $\pm$ 40.54  | 88.77 $\pm$ 5.67    | 81.47 $\pm$ 7.77     | 92.88 $\pm$ 16.08   | 98.08 $\pm$ 28.89  | 0.467                | 0.306   | 0.557     | 0.709         | 0.513              | 0.129            | 0.256                     |
| Valeric     | 16.75 $\pm$ 3.71   | 12.18 $\pm$ 3.22    | 29.18 $\pm$ 2.19   | 31.48 $\pm$ 6.19    | 11.52 $\pm$ 1.79    | 11.47 $\pm$ 2.03     | 18.43 $\pm$ 3.19    | 22.75 $\pm$ 4.63   | 0.021                | <0.0001 | 0.851     | 0.208         | 0.540              | 0.294            | 0.814                     |
| Isovaleric  | 30.98 $\pm$ 4.81   | 30.83 $\pm$ 5.54    | 35.18 $\pm$ 2.1    | 33.95 $\pm$ 3.64    | 17.82 $\pm$ 1.94    | 16.55 $\pm$ 1.37     | 24.85 $\pm$ 2.72    | 19.23 $\pm$ 4.8    | <0.0001              | 0.115   | 0.439     | 0.821         | 0.605              | 0.610            | 0.759                     |
| Glyceric    | 45.27 $\pm$ 6.35   | 33.43 $\pm$ 5.2     | 29.96 $\pm$ 10.02  | 54.78 $\pm$ 10.27   | 27.08 $\pm$ 4.06    | 29.52 $\pm$ 6.73     | 33.13 $\pm$ 7.64    | 50.13 $\pm$ 15.09  | 0.349                | 0.196   | 0.200     | 0.412         | 0.797              | 0.046            | 0.380                     |
| Glycolic    | 17.17 $\pm$ 0.83   | 15.65 $\pm$ 1.23    | 18.62 $\pm$ 1.35   | 22.2 $\pm$ 1.86     | 15.72 $\pm$ 0.5     | 16.35 $\pm$ 1.06     | 15.27 $\pm$ 1.16    | 14.08 $\pm$ 1.57   | 0.001                | 0.146   | 0.673     | 0.005         | 0.467              | 0.363            | 0.059                     |
| Lactic      | 220 $\pm$ 54.76    | 145.8 $\pm$ 30.11   | 134.2 $\pm$ 45.34  | 77.67 $\pm$ 21.39   | 303.88 $\pm$ 86.69  | 179.03 $\pm$ 58.93   | 115.77 $\pm$ 52.2   | 66.22 $\pm$ 26.57  | 0.552                | 0.003   | 0.043     | 0.319         | 0.766              | 0.527            | 0.694                     |
| Pyruvic     | 104.08 $\pm$ 12.79 | 82.67 $\pm$ 9.19    | 87.72 $\pm$ 2.61   | 67.55 $\pm$ 8.68    | 122.13 $\pm$ 27.76  | 108.47 $\pm$ 16.44   | 95.88 $\pm$ 7.74    | 93.87 $\pm$ 10.63  | 0.066                | 0.088   | 0.174     | 0.822         | 0.534              | 0.757            | 0.802                     |
| Succinic    | 18.37 $\pm$ 3.03   | 19.85 $\pm$ 2.94    | 22.36 $\pm$ 4.74   | 16.97 $\pm$ 3.08    | 19.9 $\pm$ 5.36     | 13.78 $\pm$ 3.08     | 12.2 $\pm$ 1.59     | 17.2 $\pm$ 3.03    | 0.150                | 0.749   | 0.613     | 0.587         | 0.778              | 0.669            | 0.075                     |
| Indole-3 LA | 0.38 $\pm$ 0.08    | 0.43 $\pm$ 0.08     | 0.32 $\pm$ 0.04    | 0.5 $\pm$ 0.08      | 0.52 $\pm$ 0.14     | 0.53 $\pm$ 0.16      | 1.33 $\pm$ 0.22     | 1.13 $\pm$ 0.18    | <0.0001              | 0.001   | 0.906     | 0.001         | 0.297              | 0.826            | 0.381                     |

Supplemental Table 4: Differentially abundant PICRUSt2 identified Metacyc pathways between cohorts. Magnitude and directionality demonstrated by effect parameter (positive effect- increased in cohort 2; negative effect- decreased in cohort 2.) A cutoff of Benjamini-Hochberg adjusted  $p < 0.05$  for Welch's t (we.eBH) or Wilcoxon rank sum (wi.eBH) tests were used to identify differentially regulated pathways. Specific pathway description and general category description of pathways are provided for each pathway. (n=23-24/cohort)

| Pathway               | effect | we.eBH   | wi.eBH   | Path Description                                                               | Path Category                                                          |
|-----------------------|--------|----------|----------|--------------------------------------------------------------------------------|------------------------------------------------------------------------|
| PWY-6572              | 6.230  | 4.47E-17 | 1.22E-11 | chondroitin sulfate degradation I (bacterial)                                  | Polymeric Compound Degradation                                         |
| PWY-6263              | -4.314 | 1.32E-20 | 1.22E-11 | superpathway of menaquinol-8 biosynthesis II                                   | Cofactor, Prosthetic Group, Electron Carrier, and Vitamin Biosynthesis |
| PWY-7210              | -3.947 | 1.71E-09 | 2.92E-07 | pyrimidine deoxyribonucleotides biosynthesis from CTP                          | Nucleoside and Nucleotide Biosynthesis                                 |
| PWY-7198              | -3.791 | 1.06E-09 | 2.86E-07 | pyrimidine deoxyribonucleotides de novo biosynthesis IV                        | Nucleoside and Nucleotide Biosynthesis                                 |
| PWY-7371              | -3.410 | 6.58E-18 | 1.22E-11 | 1,4-dihydroxy-6-naphthoate biosynthesis II                                     | Cofactor, Prosthetic Group, Electron Carrier, and Vitamin Biosynthesis |
| P441-PWY              | -1.541 | 3.26E-08 | 4.82E-07 | superpathway of N-acetylneuraminate degradation                                | Carboxylate Degradation                                                |
| GLYCOLYSIS-E-D        | -1.527 | 3.75E-08 | 4.75E-07 | superpathway of glycolysis and the Entner-Doudoroff pathway                    | superpathway of glycolysis and the Entner-Doudoroff pathway            |
| PWY-5304              | 1.510  | 1.21E-06 | 5.38E-09 | superpathway of sulfur oxidation (Acidianus ambivalens)                        | Inorganic Nutrient Metabolism                                          |
| P461-PWY              | -1.503 | 8.83E-08 | 7.39E-07 | hexitol fermentation to lactate, formate, ethanol and acetate                  | Fermentation                                                           |
| PWY-6749              | -1.498 | 1.13E-06 | 5.84E-06 | CMP-legionamate biosynthesis I                                                 | Carbohydrate Biosynthesis                                              |
| PWY-7003              | -1.361 | 1.80E-07 | 3.25E-07 | glycerol degradation to butanol                                                | Fermentation                                                           |
| P23-PWY               | -1.334 | 1.79E-06 | 1.06E-05 | reductive TCA cycle I                                                          | C1 Compound Utilization and Assimilation                               |
| FUCCAT-PWY            | -1.325 | 1.33E-06 | 2.73E-06 | fructose degradation                                                           | Carbohydrate Degradation                                               |
| LACTOSECAT-PWY        | 1.322  | 3.15E-04 | 7.45E-07 | lactose and galactose degradation I                                            | Carbohydrate Degradation                                               |
| P125-PWY              | -0.993 | 8.88E-05 | 2.79E-06 | superpathway of (R,R)-butanediol biosynthesis                                  | Fermentation                                                           |
| GLUCUROCAT-PWY        | -0.979 | 1.44E-04 | 5.24E-04 | superpathway of beta-D-glucuronosides degradation                              | Secondary Metabolite Degradation                                       |
| PWY-6396              | -0.975 | 4.40E-04 | 2.07E-06 | superpathway of 2,3-butanediol biosynthesis                                    | Fermentation                                                           |
| P163-PWY              | -0.916 | 3.23E-04 | 2.73E-04 | L-lysine fermentation to acetate and butanoate                                 | Fermentation                                                           |
| GALACT-GLUCUROCAT-PWY | -0.847 | 6.67E-04 | 1.42E-03 | superpathway of hexuronide and hexuronate degradation                          | superpathway of hexuronide and hexuronate degradation                  |
| RHAMCAT-PWY           | 0.844  | 4.35E-04 | 3.62E-04 | L-rhamnose degradation I                                                       | Carbohydrate Degradation                                               |
| GLUCARDEG-PWY         | -0.814 | 3.42E-03 | 6.50E-04 | D-glucarate degradation I                                                      | Secondary Metabolite Degradation                                       |
| NAD-BIOSYNTHESIS-II   | -0.803 | 1.38E-03 | 1.69E-03 | NAD salvage pathway III (to nicotinamide riboside)                             | Cofactor, Prosthetic Group, Electron Carrier, and Vitamin Biosynthesis |
| PWY0-41               | -0.770 | 8.75E-03 | 2.62E-02 | allantoin degradation IV (anaerobic)                                           | Amine and Polyamine Degradation                                        |
| PWY0-1533             | 0.697  | 1.90E-02 | 6.99E-03 | methylphosphonate degradation I                                                | Inorganic Nutrient Metabolism                                          |
| METH-ACETATE-PWY      | -0.696 | 9.26E-03 | 3.53E-03 | methanogenesis from acetate                                                    | Respiration                                                            |
| HEXITOLDEGSUPER-PWY   | -0.691 | 1.16E-02 | 8.45E-03 | superpathway of hexitol degradation (bacteria)                                 | Secondary Metabolite Degradation                                       |
| PWY-5705              | -0.689 | 1.31E-02 | 4.29E-03 | allantoin degradation to glyoxylate III                                        | Amine and Polyamine Degradation                                        |
| GLUCARGALACTSUPER-PWY | 0.676  | 2.14E-02 | 9.88E-03 | superpathway of D-glucarate and D-galactarate degradation                      | superpathway of D-glucarate and D-galactarate degradation              |
| PWY-7237              | 0.675  | 1.04E-02 | 1.48E-02 | myo-, chiro- and scyllo-inositol degradation                                   | Secondary Metabolite Degradation                                       |
| PWY-6478              | -0.665 | 9.24E-03 | 1.96E-02 | GDP-D-glycero-alpha-D-manno-heptose biosynthesis                               | Carbohydrate Biosynthesis                                              |
| GALACTARDEG-PWY       | 0.654  | 2.16E-02 | 9.37E-03 | D-galactarate degradation I                                                    | Secondary Metabolite Degradation                                       |
| HEMESYN2-PWY          | -0.641 | 1.41E-02 | 1.56E-02 | heme b biosynthesis II (anaerobic)                                             | Cofactor, Prosthetic Group, Electron Carrier, and Vitamin Biosynthesis |
| P162-PWY              | -0.634 | 3.82E-03 | 3.78E-04 | L-glutamate degradation V (via hydroxyglutarate)                               | Fermentation                                                           |
| PWY-6895              | -0.626 | 1.96E-02 | 7.26E-04 | superpathway of thiamine diphosphate biosynthesis II                           | Cofactor, Prosthetic Group, Electron Carrier, and Vitamin Biosynthesis |
| GALACTUROCAT-PWY      | -0.626 | 1.25E-02 | 1.41E-02 | D-galacturonate degradation I                                                  | Secondary Metabolite Degradation                                       |
| PWY-6891              | -0.622 | 1.11E-02 | 3.23E-03 | thiazole biosynthesis II (aerobic bacteria)                                    | Cofactor, Prosthetic Group, Electron Carrier, and Vitamin Biosynthesis |
| PWY-5913              | 0.597  | 3.63E-02 | 1.70E-02 | partial TCA cycle (obligate autotrophs)                                        | TCA cycle                                                              |
| PWY-7254              | -0.589 | 2.57E-02 | 5.95E-03 | TCA cycle VII (acetate-producers)                                              | TCA cycle                                                              |
| PWY-5022              | -0.586 | 7.34E-03 | 3.87E-03 | 4-aminobutanoate degradation V                                                 | Fermentation                                                           |
| PWY-5837              | -0.581 | 1.79E-02 | 1.84E-02 | 2-carboxy-1,4-naphthoquinol biosynthesis                                       | Cofactor, Prosthetic Group, Electron Carrier, and Vitamin Biosynthesis |
| PWY-5863              | -0.580 | 1.76E-02 | 1.77E-02 | superpathway of phyloquinol biosynthesis                                       | Cofactor, Prosthetic Group, Electron Carrier, and Vitamin Biosynthesis |
| PWY-7242              | -0.579 | 1.70E-02 | 1.73E-02 | D-fructuronate degradation                                                     | Secondary Metabolite Degradation                                       |
| PWY-6471              | 0.573  | 2.42E-02 | 3.85E-02 | peptidoglycan biosynthesis IV (Enterococcus faecium)                           | Cell Structure Biosynthesis                                            |
| PWY-7456              | 0.569  | 1.08E-02 | 1.35E-03 | beta-(1,4)-mannan degradation                                                  | Polymeric Compound Degradation                                         |
| PWY0-166              | 0.558  | 9.30E-03 | 2.51E-02 | superpathway of pyrimidine deoxyribonucleotides de novo biosynthesis (E. coli) | Nucleoside and Nucleotide Biosynthesis                                 |
| PWY-5005              | -0.546 | 1.98E-02 | 4.03E-03 | biotin biosynthesis II                                                         | Cofactor, Prosthetic Group, Electron Carrier, and Vitamin Biosynthesis |
| P164-PWY              | -0.523 | 3.07E-02 | 4.40E-02 | purine nucleobases degradation I (anaerobic)                                   | Nucleoside and Nucleotide Degradation                                  |
| REDCITCYC             | -0.520 | 2.46E-02 | 1.60E-02 | TCA cycle VIII (helicobacter)                                                  | TCA cycle                                                              |
| PWY-5677              | -0.486 | 2.27E-02 | 1.29E-02 | succinate fermentation to butanoate                                            | Fermentation                                                           |
| PWY-6876              | 0.450  | 1.21E-02 | 2.82E-02 | isopropanol biosynthesis (engineered)                                          | isopropanol biosynthesis (engineered)                                  |
| PWY0-1261             | 0.369  | 2.40E-02 | 3.65E-02 | anhydromuropeptides recycling I                                                | Secondary Metabolite Degradation                                       |
